# Supplementary material
Source: publisher figshare collection journal article supplement (https://acs.figshare.com/ndownloader/files/11059091)
Supplement: Supplementary file 1 [file 11059091]

Compound_ID	SMILES	ΔTm values to telomeric G-quadruplex(°C)	KD values to telomeric G-quadruplex by SPR (M)	HeLa IC50(uM)	SiHa IC50(uM)	HL60 IC50(uM)	A549 IC50(uM)	U2OS IC50(uM)
7	O=C1NC(/C=C2C(C=CC=C3)=C3NC/2=O)=NC4=CC(NCCCN(C)C)=CC=C41	8.4	9.3×10-5	42.5	27.6	4.1	19.6	20.4
8	O=C1NC(/C=C2C(C=CC=C3)=C3NC/2=O)=NC4=CC(NCCCN(C)C)=C(F)C=C41	11.8	3.4×10-5	13.4	17.1	3.2	14.8	18.7
9	O=C1NC(/C=C2C(C=CC=C3)=C3NC/2=O)=NC4=CC(NCCCN(CC)CC)=C(F)C=C41	10	8.1×10-5	>50	23.4	7.5	8.6	12.6
10	O=C1NC(/C=C2C(C=CC=C3)=C3NC/2=O)=NC4=CC(NCCCN5CCOCC5)=C(F)C=C41	8.6	8.7×10-5	>50	>50	>50	>50	>50
11	O=C1NC(/C=C2C(C=CC=C3)=C3NC/2=O)=NC4=CC(N(CCCN(C)C)CCCN(C)C)=C(F)C=C41	12.6	4.8×10-5	48.6	10.1	16.1	>50	>50
12	O=C1NC(/C=C2C(C=CC(N3CCN(C)CC3)=C4)=C4NC/2=O)=NC5=CC(NCCCN(C)C)=CC=C51	16.5	3.3×10-5	49	11.5	4.3	19	14.1
13	O=C1NC(/C=C2C(C=CC(N3CCN(C)CC3)=C4)=C4NC/2=O)=NC5=CC(NCCN(C)C)=C(F)C=C51	18	2.2×10-5	15.7	3.4	7.8	2.2	6.3
14	O=C1NC(/C=C2C(C=CC(N3CCN(C)CC3)=C4)=C4NC/2=O)=NC5=CC(NCCN6CCCC6)=C(F)C=C51	18.6	2.5×10-5	17.4	10.9	3.6	4.1	6.4
15	O=C1NC(/C=C2C(C=CC(N3CCN(C)CC3)=C4)=C4NC/2=O)=NC5=CC(NCCN6CCCCC6)=C(F)C=C51	18.7	3.1×10-5	20.5	5.4	2.8	1.8	3.6
16	O=C1NC(/C=C2C(C=CC(N3CCN(C)CC3)=C4)=C4NC/2=O)=NC5=CC(NCCCN(C)C)=C(F)C=C51	23.5	7.6×10-6	3.8	2.8	2.5	9.1	3.2
17	O=C1NC(/C=C2C(C=CC(N3CCN(C)CC3)=C4)=C4NC/2=O)=NC5=CC(NCCCN(CC)CC)=C(F)C=C51	20.6	1.0×10-5	10	2.8	5.4	2.3	7.6
18	O=C1NC(/C=C2C(C=C(F)C(N(CCCN(C)C)C)=C3)=C3NC/2=O)=NC4=CC(NCCN(C)C)=C(F)C=C41	20.1	9.8×10-6	22.6	7.6	5.6	12.4	9.2
19	O=C1NC(/C=C2C(C=C(F)C(N(CCCN(C)C)C)=C3)=C3NC/2=O)=NC4=CC(NCCCN(C)C)=C(F)C=C41	18.2	3.5×10-6	7.1	2.9	6.5	14.3	8.3
20	O=C1NC(/C=C2C(C=C(F)C(N(CCCN(C)C)C)=C3)=C3NC/2=O)=NC4=CC(N5CCN(C)CC5)=C(F)C=C41	15.6	6.9×10-5	12.8	3.5	3.2	10.4	9.4
21	O=C1NC(/C=C2C(C=C(F)C(N3CCOCC3)=C4)=C4NC/2=O)=NC5=CC(NCCCN(C)C)=C(F)C=C51	11.9	8.0×10-5	30.1	>50	3.4	>50	>50
22	O=C1NC(/C=C2C(C=C(F)C(N3CCOCC3)=C4)=C4NC/2=O)=NC5=CC(NCCCN(CC)CC)=C(F)C=C51	9	9.7×10-5	34.3	43.6	4.2	>50	32.4
23	O=C1NC(/C=C2C(C=C(F)C(N3CCOCC3)=C4)=C4NC/2=O)=NC5=CC(NCCCN6CCCC6)=C(F)C=C51	8.4	7.8×10-5	>50	42.5	3.8	>50	>50
24	O=C1NC(/C=C2C(C=C(F)C(N3CCOCC3)=C4)=C4NC/2=O)=NC5=CC(NCCCN6CCOCC6)=C(F)C=C51	5.2	9.7×10-5	>50	>50	>50	>50	>50
25	O=C1NC(/C=C2C(C=C(F)C(N3CCN(C)CC3)=C4)=C4NC/2=O)=NC5=CC(N6CCN(C)CC6)=C(F)C=C51	12.2	1.9×10-5	>50	>50	12.3	>50	>50
26	O=C1NC(/C=C2C(C=C(F)C(N3CCN(C)CC3)=C4)=C4NC/2=O)=NC5=CC(NCCN(C)C)=C(F)C=C51	22.5	1.1×10-6	7.7	11.4	2.8	6	5.7
27	O=C1NC(/C=C2C(C=C(F)C(N3CCN(C)CC3)=C4)=C4NC/2=O)=NC5=CC(NCCN(CC)CC)=C(F)C=C51	23.1	1.3×10-5	9	12.4	1.7	6.1	8.2
28	O=C1NC(/C=C2C(C=C(F)C(N3CCN(C)CC3)=C4)=C4NC/2=O)=NC5=CC(NCCN6CCCC6)=C(F)C=C51	22.7	1.2×10-5	10.5	9.3	2.7	5.6	7.1
29	O=C1NC(/C=C2C(C=C(F)C(N3CCN(C)CC3)=C4)=C4NC/2=O)=NC5=CC(NCCN6CCCCC6)=C(F)C=C51	21.4	6.8×10-6	2.8	4.4	2.9	1.4	5.3
30	O=C1NC(/C=C2C(C=C(F)C(N3CCN(C)CC3)=C4)=C4NC/2=O)=NC5=CC(NCCCN(C)C)=C(F)C=C51	24.6	2.6×10-6	17.6	4.9	3.8	5.9	9
31	O=C1NC(/C=C2C(C=C(F)C(N3CCN(C)CC3)=C4)=C4NC/2=O)=NC5=CC(NCCCN(CC)CC)=C(F)C=C51	25.3	4.8×10-6	9.6	7.9	5.7	6.1	10.2
32	O=C1NC(/C=C2C(C=C(F)C(N3CCN(C)CC3)=C4)=C4NC/2=O)=NC5=CC(NCCCN6CCCC6)=C(F)C=C51	23.6	8.4×10-6	9	9.4	2.9	25.3	16.4
33	O=C1NC(/C=C2C(C=C(F)C(N3CCN(C)CC3)=C4)=C4NC/2=O)=NC5=CC(NCCCN6C=CN=C6)=C(F)C=C51	11.5	1.3×10-5	>50	>50	>50	>50	>50
34	O=C1NC(/C=C2C(C=C(F)C(N3CCN(C)CC3)=C4)=C4NC/2=O)=NC5=CC(NCCCN6CCN(C)CC6)=C(F)C=C51	19.8	8.4×10-6	8.8	2.8	3.3	9.7	12.7
35	O=C1N(C)C(/C=C2C(C=CC(N3CCN(C)CC3)=C4)=C4NC/2=O)=NC5=CC(NCCCN(C)C)=C(F)C=C51	7.4	5.9×10-6	14	14	30.6	15.4	12.5
36	O=C1N(CCCN(C)C)C(/C=C2C(C=CC=C3)=C3NC/2=O)=NC4=CC(NCCCN(C)C)=C(F)C=C41	9.2	7.4×10-5	27.1	30.5	8.2	18.2	28.4
37	O=C1NC(/C=C2C(C=CC=C3)=C3N(CCCN(CC)CC)C/2=O)=NC4=CC(N5CCN(C)CC5)=C(F)C=C41	5.8	8.6×10-5	>50	>50	13.2	>50	>50
